# Supplementary material for: Variation in Global Policy Responses to COVID-19: A Bidirectional Analysis
Source: MDPI journal article supplement (doi:10.3390/ijerph20054252), 2023-02-27
Supplement: s1 [file s1]

## Supplementary Material

**Table S1.** Countries and Territories in the Sample (n=176).

| Label | Name of Countries/Territories                                                                                                                                                                                                                               |
|-------|-------------------------------------------------------------------------------------------------------------------------------------------------------------------------------------------------------------------------------------------------------------|
| AB    | Afghanistan Albania Algeria Andorra Angola Argentina Aruba Australia Austria Azerbaijan Bahamas Bahrain Bangladesh Barbados Belarus Belgium Belize Benin Bermuda Bhutan Bolivia Bosnia and Herzegovina Botswana Brazil Brunei Bulgaria Burkina Faso Burundi |
| CD    | Cambodia Cameroon Canada Cape Verde Central African Republic Chad Chile China Colombia Comoros Congo Costa Rica Cote d'Ivoire Croatia Cuba Cyprus Democratic Republic of Congo Denmark Djibouti Dominica Dominican Republic                                 |
| EF    | Ecuador Egypt El Salvador Eritrea Estonia Eswatini Ethiopia Faeroe Islands Fiji Finland France                                                                                                                                                              |
| GH    | Gabon Gambia Georgia Germany Ghana Greece Greenland Grenada Guatemala Guinea Guyana Haiti Honduras Hungary                                                                                                                                                  |
| IJ    | Iceland India Indonesia Iran Iraq Ireland Israel Italy Jamaica Japan Jordan                                                                                                                                                                                 |
| KL    | Kazakhstan Kenya Kiribati Kosovo Kuwait Laos Latvia Lebanon Lesotho Liberia Libya Liechtenstein Lithuania Luxembourg                                                                                                                                        |
| MN    | Madagascar Malawi Malaysia Mali Malta Mauritania Mauritius Mexico Moldova Monaco Mongolia Morocco Mozambique Myanmar Namibia Nepal Netherlands New Zealand Nicaragua Niger Nigeria Norway                                                                   |
| OP    | Oman Pakistan Palestine Panama Papua New Guinea Paraguay Peru Philippines Poland Portugal                                                                                                                                                                   |
| QR    | Qatar Romania Russia Rwanda                                                                                                                                                                                                                                 |
| ST    | San Marino Saudi Arabia Senegal Serbia Seychelles Sierra Leone Singapore Slovenia Solomon Islands Somalia Somalia South Africa                                                                                                                              |
| UV    | South Korea South Sudan Spain Sri Lanka Sudan Suriname Sweden Switzerland Syria Tajikistan Tanzania Thailand Togo Tonga Trinidad and Tobago Tunisia Turkey                                                                                                  |
| YZ    | Uganda Ukraine United Arab Emirates United Kingdom United States Uruguay Uzbekistan Vanuatu Venezuela Vietnam Yemen Zambia Zimbabwe                                                                                                                         |

**Table S2.** Descriptions and explanations of variables.

| Variable (Name)                              | Definition/Description                                                                                                              | Source                                                               |
|----------------------------------------------|-------------------------------------------------------------------------------------------------------------------------------------|----------------------------------------------------------------------|
| stringency<br>(Stringency Index)             | the level of government non-pharmaceutical interventions with the score of 0 to 100.                                                | OxCGRT                                                               |
| new_deaths<br>(New Deaths)                   | The number of COVID-19 deaths of a country or territory on the observed day.                                                        | COVID-19 Data Repository (CSSE)                                      |
| vacci_fpc<br>(Fully Vaccinated Percentage)   | The account of people who received all doses prescribed by the initial vaccination protocol in the total population of the country. | Self-computation on basis of Mathieu et al. 2021 and World bank 2022 |
| helt_cp<br>(Health Capacity)                 | The health capacity of clinics, hospitals and community care centers in coping with pandemics with the score of 0 to 100.           | Global Health Security (GHS) Index 2021                              |
| new_cases<br>(New Cases)                     | The number of confirmed cases of a country or territory on the observed day.                                                        | COVID-19 Data Repository (CSSE)                                      |
| vacci_pc<br>(Vaccinated Percentage)          | The account of people who received at least one vaccine dose in the total population of the country.                                | Self-computation on basis of Mathieu et al. 2021 and World bank 2022 |
| hosp<br>(Hospital Bed)                       | Hospital beds per 10 000 population                                                                                                 | WHO                                                                  |
| C1<br>(School closing)                       | Record closings of schools and universities with the ordinal scale of 0 to 3.                                                       | OxCGRT                                                               |
| C2<br>(Workplace closing)                    | Record closings of workplaces with the ordinal scale of 0 to 3.                                                                     | OxCGRT                                                               |
| C3<br>(Cancel public events)                 | Record cancelling public events with the ordinal scale of 0 to 2.                                                                   | OxCGRT                                                               |
| C4<br>(Restrictions on gathering size)       | Record limits on gatherings with the ordinal scale of 0 to 4.                                                                       | OxCGRT                                                               |
| C5<br>(Close public transport)               | Record closing of public transport with the ordinal scale of 0 to 2.                                                                | OxCGRT                                                               |
| C6<br>(Stay at home requirements)            | Record orders to "shelter-in-place" and otherwise confine to the home with the ordinal scale of 0 to 3.                             | OxCGRT                                                               |
| C7<br>(Restrictions on internal Movement)    | Record restrictions on internal movement between cities/regions with the ordinal scale of 0 to 2.                                   | OxCGRT                                                               |
| C8<br>(Restrictions on international travel) | Record restrictions on international travel with the ordinal scale of 0 to 4.                                                       | OxCGRT                                                               |
| H1<br>(Public information campaign)          | Record presence of public info campaigns with the ordinal scale of 0 to 2.                                                          | OxCGRT                                                               |

## Variation in Global Policy Responses to COVID-19: A Bidirectional Analysis

Notes: The stringency index is a composite measure of nine of the response metrics, including school closures (C1); workplace closures (C2); cancellation of public events(C3); restrictions on public gatherings(C4); closures of public transport(C5); stay-at-home requirement(C6); public information campaigns(H1); restrictions on internal movements(C7); and international travel controls(C8). The variable of health capacity is defined within the field of clinics, hospitals and community care centers, this index contains available human resources for the broader healthcare system and facilities capacity. To compute the index, doctors per 100,000 people, nurses and midwives per 100,000 people and hospital beds per 100,000 people have been used, additionally, three questions are assessed by Economist Impact analyst in a qualitative approach according to official national sources.

**Table S3.** Frequency of Categories of Stringency Index Components.

| Components of Stringency Index | Frequency of Individual Category (Percent) |       |       |       |       | Observations |
|--------------------------------|--------------------------------------------|-------|-------|-------|-------|--------------|
|                                | 0                                          | 1     | 2     | 3     | 4     |              |
| C1                             | 28.52                                      | 41.61 | 18.40 | 11.46 |       | 52,721       |
| C2                             | 17.34                                      | 38.48 | 35.34 | 7.83  |       | 52,274       |
| C3                             | 16.25                                      | 36.86 | 46.90 |       |       | 52,278       |
| C4                             | 20.01                                      | 4.24  | 11.57 | 33.47 | 30.71 | 52,249       |
| C5                             | 59.48                                      | 30.90 | 9.63  |       |       | 52,250       |
| C6                             | 46.54                                      | 24.22 | 27.90 | 1.35  |       | 52,227       |
| C7                             | 60.98                                      | 13.01 | 26.01 |       |       | 52,249       |
| C8                             | 1.41                                       | 31.50 | 32.06 | 25.12 | 9.92  | 52,259       |
| H1                             | 1.65                                       | 5.99  | 92.36 |       |       | 52,230       |

**Table S4.** Correlation of Variables.

|                             | Stringency Index      | New Deaths           | Fully Vaccinated Percentage | Health Capacity  |
|-----------------------------|-----------------------|----------------------|-----------------------------|------------------|
| Stringency Index            | 1.000<br>(52226)      |                      |                             |                  |
| New Deaths                  | 0.140 ***<br>(50869)  | 1.000<br>(52316)     |                             |                  |
| Fully Vaccinated Percentage | -0.146 ***<br>(23949) | 0.032 ***<br>(24136) | 1.000<br>(24303)            |                  |
| Health Capacity             | 0.116 ***<br>(50441)  | 0.226 ***<br>(50987) | 0.357 ***<br>(23885)        | 1.000<br>(51850) |

Note: star(0.01) obs pwcrr(correlation); Robust standard errors in parentheses; \*\*\*  $p < 0.01$ ; \*\*  $p < 0.05$ ; \*  $p < 0.1$ .

**Table S5.** Estimated Models and Equations.

| Models  | Equations                                                                                                                                                                                      |
|---------|------------------------------------------------------------------------------------------------------------------------------------------------------------------------------------------------|
| Model 1 | $S_{it} = \beta_0 + \beta_1 ND^{-1} + f_i + d_{ct} + \varepsilon_t$ (M1. 1)                                                                                                                    |
|         | $ND_{it} = \beta_0 + \beta_2 S^{-1} + f_i + d_{ct} + \varepsilon_t$ (M1. 2)                                                                                                                    |
| Model 2 | $S_{it} = \beta_0 + \beta_3 ND^{-1} + \beta_4 ND^{-2} + \beta_5 VF^{-1} + \beta_6 VF^{-2} + f_i + d_{ct} + \varepsilon_t$ (M2. 1)                                                              |
|         | $ND_{it} = \beta_0 + \beta_7 S^{-1} + \beta_8 S^{-2} + \beta_9 VF^{-1} + \beta_{10} VF^{-2} + f_i + d_{ct} + \varepsilon_t$ (M2. 2)                                                            |
|         | $VF_{it} = \beta_0 + \beta_{11} S^{-1} + \beta_{12} S^{-2} + \beta_{13} ND^{-1} + \beta_{14} ND^{-2} + f_i + d_{ct} + \varepsilon_t$ (M2. 3)                                                   |
| Model 3 | $S_{it} = \beta_0 + \beta_{15} ND^{-1} + \beta_{16} ND^{-2} + \beta_{17} ND^{-3} + \beta_{18} HC^{-1} + \beta_{19} HC^{-2} + \beta_{20} HC^{-3} + f_i + d_{ct} + \varepsilon_t$ (M3. 1)        |
|         | $ND_{it} = \beta_0 + \beta_{21} S^{-1} + \beta_{22} S^{-2} + \beta_{23} S^{-3} + \beta_{24} HC^{-1} + \beta_{25} HC^{-2} + \beta_{26} HC^{-3} + f_i + d_{ct} + \varepsilon_t$ (M3. 2)          |
|         | $HC_{it} = \beta_0 + \beta_{27} S^{-1} + \beta_{28} S^{-2} + \beta_{29} S^{-3} + \beta_{30} ND^{-1} + \beta_{31} ND^{-2} + \beta_{32} ND^{-3} + \varepsilon_t$ (M3. 3)                         |
| Model 4 | $S_{it} = \beta_0 + \beta_{33} ND^{-1} + \beta_{34} ND^{-2} + \beta_{35} VF^{-1} + \beta_{36} VF^{-2} + \beta_{37} HC^{-1} + \beta_{38} HC^{-2} + \varepsilon_t$ (M4. 1)                       |
|         | $ND_{it} = \beta_0 + \beta_{39} S^{-1} + \beta_{40} S^{-2} + \beta_{41} VF^{-1} + \beta_{42} VF^{-2} + \beta_{43} HC^{-1} + \beta_{44} HC^{-2} + \varepsilon_t$ (M4. 2)                        |
|         | $VF_{it} = \beta_0 + \beta_{45} S^{-1} + \beta_{46} S^{-2} + \beta_{47} ND^{-1} + \beta_{48} ND^{-2} + \beta_{49} HC^{-1} + \beta_{50} HC^{-2} + \varepsilon_t$ (M4. 3)                        |
|         | $HC_{it} = \beta_0 + \beta_{51} S^{-1} + \beta_{52} S^{-2} + \beta_{53} ND^{-1} + \beta_{54} ND^{-2} + \beta_{55} HC^{-1} + \beta_{56} HC^{-2} + \varepsilon_t$ (M4. 4)                        |
| Model 5 | $S_{it} = \beta_0 + \beta_{57} ND^{-2} + \beta_{58} VF^{-2} + \beta_{59} HC + \beta_{60} ND^{-2} * VF^{-2} + \beta_{61} ND^{-2} * HC + \beta_{62} ND^{-2} * VF^{-2} * HC + \varepsilon_t$ (M5) |
| Model 6 | $S_{it} = \beta_0 + \beta_{63} ND^{-2} + \beta_{64} VF^{-2} + \beta_{65} HC + \beta_{66} ND^{-2} * VF^{-2} + \beta_{67} ND^{-2} * HC + \beta_{68} ND^{-2} * VF^{-2} * HC + \varepsilon_t$ (M6) |

Notes: S denotes stringency (Stringency Index), ND represents new\_deaths (New Deaths), VF is the abbreviation of vacci\_fpc (Fully Vaccinated Percentage) and HC signifies helt\_cp (Health Capacity). As for the order of lags, Model1 has the order of one lag, Model 2 has the order of two lag, Model 3

## Variation in Global Policy Responses to COVID-19: A Bidirectional Analysis

has the order of three lag and Model 4 has the order of two lag. Model 5 is a random effect regression and Model 6 is a fixed effect regression, with ND and VF lagged by two days.

**Table S6.** Panel unit root test using IPS and Fisher Methods (Model 1, Model 2, Model 3 and Model 4).

| Model   | Testing Method  | Stringency Index       | New Deaths             | Fully Vaccinated Percentage | Health Capacity        |
|---------|-----------------|------------------------|------------------------|-----------------------------|------------------------|
| Model 1 | IPS             | $-1.6 \times 10^2$ *** | $-1.6 \times 10^2$ *** |                             |                        |
|         | ADF-Fisher (P)  | $2.07 \times 10^4$ *** | $2.09 \times 10^4$ *** |                             |                        |
|         | ADF-Fisher (Z)  | -136.628 ***           | -138.004 ***           |                             |                        |
|         | ADF-Fisher (L*) | -327.528 ***           | -330.069 ***           |                             |                        |
|         | ADF-Fisher (Pm) | 576.418 ***            | 581.018 ***            |                             |                        |
| Model 2 | IPS             | $-1.2 \times 10^2$ *** | $-1.1 \times 10^2$ *** | -                           |                        |
|         | ADF-Fisher (P)  | $1.66 \times 10^4$ *** | $1.46 \times 10^4$ *** | 643.141 ***                 |                        |
|         | ADF-Fisher (Z)  | -120.962 ***           | -113.119 ***           | -10.750 ***                 |                        |
|         | ADF-Fisher (L*) | -262.685 ***           | -230.638 ***           | -10.870 ***                 |                        |
|         | ADF-Fisher (Pm) | 458.858 ***            | 400.729 ***            | 12.420 ***                  |                        |
| Model 3 | IPS             | -                      | -91.593 ***            |                             | -91.916 ***            |
|         | ADF-Fisher (P)  | $1.23 \times 10^4$ *** | $1.17 \times 10^4$ *** |                             | $1.17 \times 10^4$ *** |
|         | ADF-Fisher (Z)  | -102.674 ***           | -100.003 ***           |                             | -100.350 ***           |
|         | ADF-Fisher (L*) | -196.253 ***           | -185.162 ***           |                             | -184.967 ***           |
|         | ADF-Fisher (Pm) | 338.499 ***            | 318.272 ***            |                             | 317.920 ***            |
| Model 4 | IPS             | $-1.2 \times 10^2$ *** | $-1.1 \times 10^2$ *** | -                           | $-1.1 \times 10^2$ *** |
|         | ADF-Fisher (P)  | $1.66 \times 10^4$ *** | $1.46 \times 10^4$ *** | 643.141 ***                 | $1.51 \times 10^4$ *** |
|         | ADF-Fisher (Z)  | -120.962 ***           | -113.119 ***           | -10.750 ***                 | -115.852 ***           |
|         | ADF-Fisher (L*) | -262.685 ***           | -230.638 ***           | -10.870 ***                 | -239.208 ***           |
|         | ADF-Fisher (Pm) | 458.858 ***            | 400.729 ***            | 12.420 ***                  | 416.269 ***            |

Notes: Robust standard errors in parentheses. \*\*\*  $p < 0.01$ , \*\*  $p < 0.05$ , \*  $p < 0.1$ .

In the Model 1, xtunitroot ips stringency, lags(1) demean, ADF regressions: 1 lags, W-t-bar. In the ADF-fisher tests of stringency, xtunitroot fisher stringency, dfuller drift lags(1) demean, ADF-Fisher (P) represents Inverse chi-squared (610), ADF-Fisher (Z) is Inverse normal, ADF-Fisher (L\*) represents Inverse logit t(1529) and ADF-Fisher (Pm) represents Modified inv.chi-squared.

In the Model 2, xtunitroot ips stringency, lags(2) demean, ADF regressions: 1 lags, W-t-bar. The absence of fully vaccinated percentage in the test of IPS lies in insufficient observations. In the ADF-fisher tests of stringency, xtunitroot fisher vacci\_fpc, dfuller drift lags(2) demean, ADF-Fisher (P) represents Inverse chi-squared (326), ADF-Fisher (Z) is Inverse normal, ADF-Fisher (L\*) represents Inverse logit t(819) and ADF-Fisher (Pm) represents Modified inv.chi-squared.

In the Model 3, xtunitroot ips stringency, lags(3) demean, ADF regressions: 1 lags, W-t-bar. The absence of Stringency Index in the test of IPS lies in insufficient number of time periods to compute W-t-bar. In the ADF-fisher tests of stringency, xtunitroot fisher vacci\_fpc, dfuller drift lags(2) demean, ADF-Fisher (P) represents Inverse chi-squared (602), ADF-Fisher (Z) is Inverse normal, ADF-Fisher (L\*) represents Inverse logit t(1509) and ADF-Fisher (Pm) represents Modified inv.chi-squared.

In the Model 4, xtunitroot ips stringency, lags(2) demean, ADF regressions: 1 lags, W-t-bar. The absence of fully vaccinated percentage in the test of IPS lies in insufficient observations. In the ADF-fisher tests of stringency, xtunitroot fisher helt\_cp, dfuller drift lags(2) demean, ADF-Fisher (P) represents Inverse chi-squared (610), ADF-Fisher (Z) is Inverse normal, ADF-Fisher (L\*) represents Inverse logit t(1529) and ADF-Fisher (Pm) represents Modified inv.chi-squared.

**Table S7.** Panel VAR Lag Order Selection on Estimation Sample of Model 1, Model 2, Model 3 and Model 4.

| Model   | lag | CD    | J      | J pvalue | MBIC    | MAIC  | MQIC    |
|---------|-----|-------|--------|----------|---------|-------|---------|
| Model 1 | 1   | 0.997 | 31.176 | 0.002    | -98.605 | 7.176 | -25.967 |
|         | 2   | 0.997 | 23.390 | 0.003    | -63.131 | 7.390 | -14.705 |

# Variation in Global Policy Responses to COVID-19: A Bidirectional Analysis

|         |   |        |          |                         |          |          |          |
|---------|---|--------|----------|-------------------------|----------|----------|----------|
|         | 3 | 0.997  | 21.194   | 0.003                   | −22.066  | 13.194   | 2.146    |
|         | 4 | 0.997  | .        | .                       | .        | .        | .        |
| Model 2 | 1 | 0.887  | 141.286  | $1.92 \times 10^{-17}$  | −20.685  | 87.286   | 44.541   |
|         | 2 | 0.907  | 83.553   | $2.03e \times 10^{-10}$ | −24.428  | 47.553   | 19.056   |
|         | 3 | 0.955  | 30.728   | 0.000                   | −23.262  | 12.728   | −1.520   |
|         | 4 | 0.882  | .        | .                       | .        | .        | .        |
| Model 3 | 1 | −0.042 | 5999.998 | 0.000                   | 5715.879 | 5945.998 | 5872.906 |
|         | 2 | 0.008  | 3277.351 | 0.000                   | 3087.938 | 3241.351 | 3192.623 |
|         | 3 | 0.029  | 1918.908 | 0.000                   | 1824.202 | 1900.908 | 1876.544 |
|         | 4 | −0.014 | .        | .                       | .        | .        | .        |
| Model 4 | 1 | 0.919  | 253.248  | $1.09 \times 10^{-29}$  | −33.127  | 157.248  | 81.782   |
|         | 2 | 0.961  | 128.269  | $1.78 \times 10^{-13}$  | −62.648  | 64.269   | 13.958   |
|         | 3 | 0.984  | 93.466   | $5.72 \times 10^{-13}$  | −1.99    | 61.466   | 36.311   |
|         | 4 | 0.980  | .        | .                       | .        | .        | .        |

Note: For Model 1, the number of observations is 49763 with 174 panels. According to the selection order criteria, the random sample is shown as 22450-22749; For Model 2, the number of observations is 403 with 139 panels. According to the selection order criteria, the random sample is shown as 7-175; For Model 3, the number of observations is 37158 with 304 panels. According to the selection order criteria, the random sample is shown as 6-175; For Model 4, the number of observations is 390 with 138 panels. According to the selection order criteria, the random sample is shown as 7-175.

**Table S8.** Eigenvalue Stability Condition of Model 1, Model 2, Model 3 and Model 4.

| Model   | Eigenvalue |           | Modulus |
|---------|------------|-----------|---------|
|         | Real       | Imaginary |         |
| Model 1 | 0.056      | −0.052    | 0.077   |
|         | 0.056      | 0.052     | 0.077   |
| Model 2 | 0.618      | −0.188    | 0.646   |
|         | 0.618      | 0.188     | 0.646   |
|         | −0.089     | −0.564    | 0.571   |
|         | −0.089     | 0.564     | 0.571   |
|         | −0.407     | −0.116    | 0.423   |
|         | −0.407     | 0.116     | 0.423   |
| Model 3 | 0.766      | 0         | 0.766   |
|         | 0.121      | 0.560     | 0.572   |
|         | 0.121      | −0.560    | 0.572   |
|         | −0.397     | −0.408    | 0.569   |
|         | −0.397     | 0.408     | 0.569   |
|         | 0.559      | 0         | 0.559   |
|         | −0.460     | 0         | 0.460   |
|         | −0.159     | 0.426     | 0.455   |
|         | −0.159     | −0.426    | 0.455   |
| Model 4 | 0.614      | 0.391     | 0.727   |
|         | 0.614      | −0.391    | 0.727   |
|         | −0.546     | 0.214     | 0.586   |
|         | −0.546     | −0.214    | 0.586   |
|         | −0.110     | −0.571    | 0.581   |
|         | −0.110     | 0.571     | 0.581   |
|         | 0.276      | 0         | 0.276   |
|         | −0.022     | 0         | 0.022   |

Note: All values in the table above have been approximated with three digits. All the eigenvalues lie inside the unit circle, which proves that PVAR satisfies stability condition.

## Variation in Global Policy Responses to COVID-19: A Bidirectional Analysis

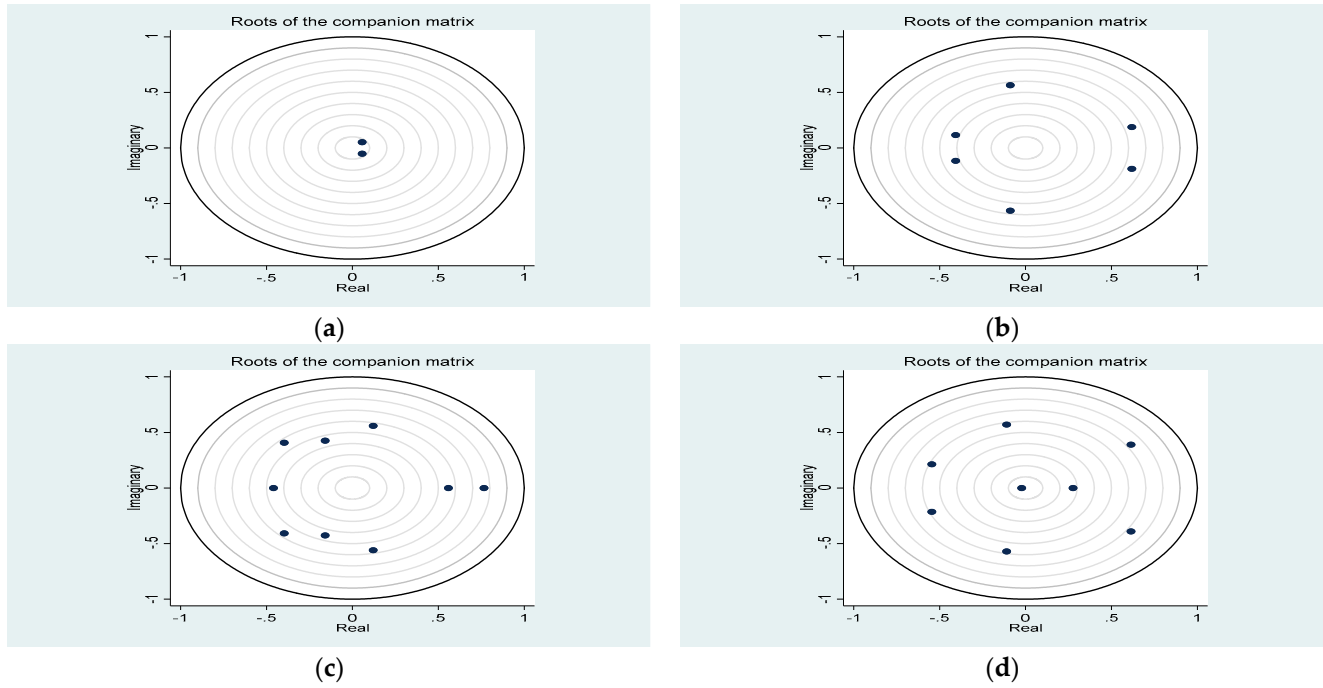

**Figure S1.** Roots of Companion Matrix of (a) Model 1, (b) Model 2, (c) Model 3 and (d) Model 4.

**Table S9.** Grange Causality Test of Model 1, Model 2 and Model 3.

| Model   | Equation   | Excluded variables | Chi2     | df   | Prob. |
|---------|------------|--------------------|----------|------|-------|
| Model 1 | stringency | stringency         | n.a.     | n.a. | n.a.  |
|         |            | new_deaths         | 22.754   | 1    | 0.000 |
|         |            | All                | 22.754   | 1    | 0.000 |
|         | new_deaths | new_deaths         | n.a.     | n.a. | n.a.  |
|         |            | stringency         | 473.344  | 1    | 0.000 |
|         |            | All                | 473.344  | 1    | 0.000 |
| Model 2 | stringency | stringency         | n.a.     | n.a. | n.a.  |
|         |            | new_deaths         | 17.417   | 2    | 0.000 |
|         |            | vacci_fpc          | 77.501   | 2    | 0.000 |
|         |            | All                | 114.942  | 4    | 0.000 |
|         | new_deaths | new_deaths         | n.a.     | n.a. | n.a.  |
|         |            | stringency         | 205.146  | 2    | 0.000 |
|         |            | vacci_fpc          | 134.810  | 2    | 0.000 |
|         |            | All                | 341.583  | 4    | 0.000 |
|         | vacci_fpc  | vacci_fpc          | n.a.     | n.a. | n.a.  |
|         |            | stringency         | 807.070  | 2    | 0.000 |
|         |            | new_deaths         | 40.817   | 2    | 0.000 |
|         |            | All                | 846.670  | 4    | 0.000 |
| Model 3 | stringency | stringency         | n.a.     | n.a. | n.a.  |
|         |            | new_deaths         | 323.974  | 3    | 0.000 |
|         |            | helt_cp            | 1625.035 | 3    | 0.000 |
|         |            | All                | 2672.404 | 6    | 0.000 |
|         | new_deaths | new_deaths         | n.a.     | n.a. | n.a.  |
|         |            | stringency         | 116.946  | 3    | 0.000 |
|         |            | helt_cp            | 2341.553 | 3    | 0.000 |
|         |            | All                | 2480.523 | 6    | 0.000 |
|         | helt_cp    | helt_cp            | n.a.     | n.a. | n.a.  |
|         |            | stringency         | 1545.326 | 3    | 0.000 |
|         |            | new_deaths         | 302.429  | 3    | 0.000 |
|         |            | All                | 2006.303 | 6    | 0.000 |

**Table S10.** Grange Causality Test of Model 4.

| Equation | Excluded variables | Chi2 | df | Prob. |
|----------|--------------------|------|----|-------|
|----------|--------------------|------|----|-------|

## Variation in Global Policy Responses to COVID-19: A Bidirectional Analysis

|         |            |            |         |      |       |
|---------|------------|------------|---------|------|-------|
| Model 4 | stringency | stringency | n.a.    | n.a. | n.a.  |
|         |            | new_deaths | 5.058   | 2    | 0.080 |
|         |            | vacci_fpc  | 111.496 | 2    | 0.000 |
|         |            | helt_cp    | 101.264 | 2    | 0.000 |
|         |            | All        | 264.992 | 6    | 0.000 |
|         | new_deaths | new_deaths | n.a.    | n.a. | n.a.  |
|         |            | stringency | 144.869 | 2    | 0.000 |
|         |            | vacci_fpc  | 13.488  | 2    | 0.001 |
|         |            | helt_cp    | 344.989 | 2    | 0.000 |
|         |            | All        | 568.516 | 6    | 0.000 |
|         | vacci_fpc  | vacci_fpc  | n.a.    | n.a. | n.a.  |
|         |            | stringency | 840.309 | 2    | 0.000 |
|         |            | new_deaths | 55.946  | 2    | 0.000 |
|         |            | helt_cp    | 27.504  | 2    | 0.000 |
|         |            | All        | 939.842 | 6    | 0.000 |
|         | helt_cp    | helt_cp    | n.a.    | n.a. | n.a.  |
|         |            | stringency | 37.106  | 2    | 0.000 |
|         |            | new_deaths | 172.788 | 2    | 0.000 |
|         |            | vacci_fpc  | 252.823 | 2    | 0.000 |
|         |            | All        | 340.946 | 6    | 0.000 |

### Orthogonalized Impulse-response of PVAR Models

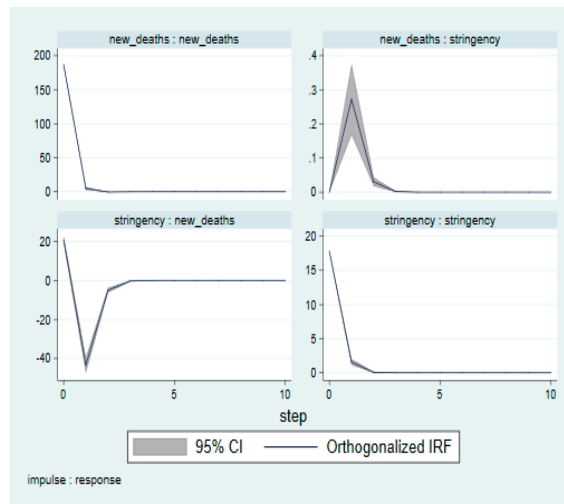

**Figure S2.** Graph of Orthogonalized Impulse-response in Model 1.

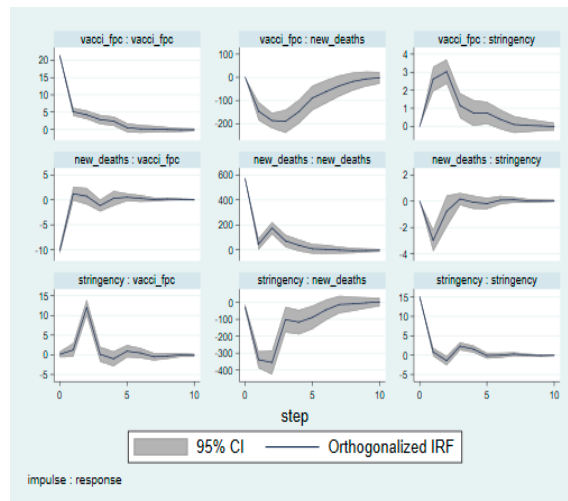

**Figure S3.** Graph of Orthogonalized Impulse-response in Model 2.

## Variation in Global Policy Responses to COVID-19: A Bidirectional Analysis

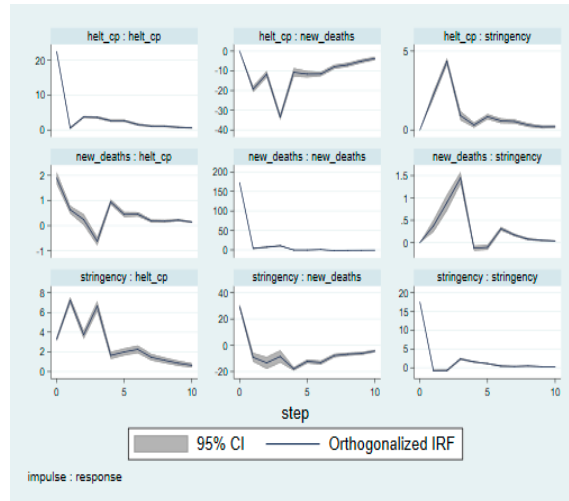

**Figure S4.** Graph of Orthogonalized Impulse-response in Model 3.

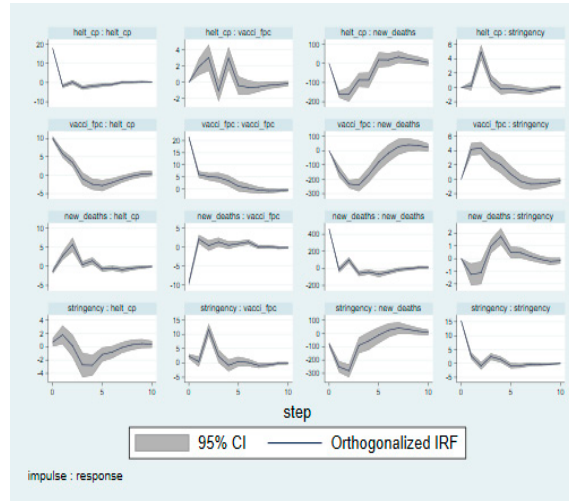

**Figure S5.** Graph of Orthogonalized Impulse-response in Model 4.

Note: The IRF confidence intervals are computed using 200 Monte Carlo draws from the distribution of the fitted reduced-form panel VAR model. The vertical axis is the intensity of impulse response and the horizontal axis signifies the lag period, while the solid line is the impulse response function curve, and the shaded areas represent 95% confidence intervals.

### Detailed Results of Model 6

**Table S11.** Variance in policy responses in June 2021, July 2021 and August 2021.

| Independent variables      | Dependent variable: stringency |                                     |                                                        |
|----------------------------|--------------------------------|-------------------------------------|--------------------------------------------------------|
|                            | June 2021                      | July 2021                           | August 2021                                            |
| new_deaths(-2) (I)         | 0.056 ***<br>(0.010)           | 0.068 ***<br>(0.008)                | 0.048 ***<br>(0.007)                                   |
| vacci_fpc (-2) (II)        | -0.141 ***<br>(0.030)          | -0.169 ***<br>(0.017)               | -0.102 ***<br>(0.015)                                  |
| helt_cp (III)              | -0.070 ***<br>(0.025)          | -0.075 ***<br>(0.016)               | -0.080 ***<br>(0.017)                                  |
| Interaction (I × II)       | 0.000<br>(0.001)               | 0.002 **<br>(0.001)                 | 0.001<br>(0.000)                                       |
| Interaction (I × III)      | -0.001 ***<br>(0.000)          | -0.002 ***<br>(0.000)               | -0.001 ***<br>(0.000)                                  |
| Interaction (I × II × III) | 0.000<br>(0.000)               | -3.36 × 10 <sup>-6</sup><br>(0.000) | -1.64 × 10 <sup>-6</sup><br>(5.30 × 10 <sup>-6</sup> ) |
| Constant                   | 61.164 ***                     | 60.384 ***                          | 59.523 ***                                             |

# Variation in Global Policy Responses to COVID-19: A Bidirectional Analysis

|              |         |         |         |
|--------------|---------|---------|---------|
|              | (1.036) | (0.690) | (0.716) |
| Observations | 1147    | 2543    | 2613    |
| Date         | 14      | 31      | 31      |
| r2 within    | 0.106   | 0.186   | 0.133   |
| r2 between   | 0.276   | 0.010   | 0.092   |
| r2 overall   | 0.107   | 0.185   | 0.131   |

Note: Standard errors are in parentheses, \*\*\*  $p < 0.01$ , \*\*  $p < 0.05$ , \*  $p < 0.1$ .

**Table S12.** Variance in policy responses in September 2021 and October 2021.

| Independent variables      | Dependent variable: stringency                     |                                         |
|----------------------------|----------------------------------------------------|-----------------------------------------|
|                            | September 2021                                     | October 2021                            |
| new_deaths(-2) (I)         | 0.075 ***<br>(0.011)                               | 0.021<br>(0.017)                        |
| vacci_fpc (-2) (II)        | -0.057 ***<br>(0.017)                              | 0.018<br>(0.017)                        |
| helt_cp (III)              | -0.032 *<br>(0.019)                                | 0.003<br>(0.019)                        |
| Interaction (I × II)       | -0.000<br>(0.000)                                  | 0.001 **<br>(0.001)                     |
| Interaction (I × III)      | -0.001 ***<br>(0.000)                              | -0.000<br>(0.000)                       |
| Interaction (I × II × III) | $5.08 \times 10^{-6}$<br>( $4.58 \times 10^{-6}$ ) | -0.000 **<br>( $7.63e \times 10^{-6}$ ) |
| Constant                   | 55.772 ***<br>(0.834)                              | 48.378 ***<br>(0.846)                   |
| Observations               | 2475                                               | 2460                                    |
| Date                       | 30                                                 | 31                                      |
| r2 within                  | 0.080                                              | 0.029                                   |
| r2 between                 | 0.231                                              | 0.048                                   |
| r2 overall                 | 0.081                                              | 0.029                                   |

Note: Standard errors are in parentheses, \*\*\*  $p < 0.01$ , \*\*  $p < 0.05$ , \*  $p < 0.1$ .

**Table S13.** Variance in policy responses in November 2021 and December 2021.

| Independent variables      | Dependent variable: stringency                     |                                                     |
|----------------------------|----------------------------------------------------|-----------------------------------------------------|
|                            | November 2021                                      | December 2021                                       |
| new_deaths(-2) (I)         | 0.018<br>(0.016)                                   | -0.007<br>(0.021)                                   |
| vacci_fpc (-2) (II)        | 0.039 **<br>(0.016)                                | -0.021<br>(0.015)                                   |
| helt_cp (III)              | 0.133 ***<br>(0.019)                               | 0.165 ***<br>(0.017)                                |
| Interaction (I × II)       | 0.000<br>(0.000)                                   | 0.001<br>(0.000)                                    |
| Interaction (I × III)      | -0.000<br>(0.000)                                  | -0.000<br>(0.000)                                   |
| Interaction (I × II × III) | $7.67 \times 10^{-7}$<br>( $7.28 \times 10^{-6}$ ) | $-2.11 \times 10^{-6}$<br>( $7.17 \times 10^{-6}$ ) |
| Constant                   | 41.502 ***<br>(0.852)                              | 44.738 ***<br>(0.833)                               |
| Observations               | 2392                                               | 2406                                                |
| Date                       | 30                                                 | 31                                                  |
| r2 within                  | 0.045                                              | 0.049                                               |
| r2 between                 | 0.306                                              | 0.150                                               |
| r2 overall                 | 0.046                                              | 0.050                                               |

Note: Standard errors are in parentheses, \*\*\*  $p < 0.01$ , \*\*  $p < 0.05$ , \*  $p < 0.1$ .

**Table S14.** Variance in policy responses in January 2022 and February 2022.

| Independent variables | Dependent variable: stringency |                       |
|-----------------------|--------------------------------|-----------------------|
|                       | January 2022                   | February 2022         |
| new_deaths(-2) (I)    | 0.056 *<br>(0.031)             | 0.097 ***<br>(0.033)  |
| vacci_fpc (-2) (II)   | -0.019<br>(0.015)              | -0.068 ***<br>(0.019) |



## Variation in Global Policy Responses to COVID-19: A Bidirectional Analysis

|                            |                                                    |                       |
|----------------------------|----------------------------------------------------|-----------------------|
| helt_cp (III)              | 0.154 ***<br>(0.017)                               | 0.084 ***<br>(0.020)  |
| Interaction (I × II)       | 0.001<br>(0.001)                                   | −0.000<br>(0.001)     |
| Interaction (I × III)      | −0.002 ***<br>(0.001)                              | −0.002 ***<br>(0.001) |
| Interaction (I × II × III) | $4.34 \times 10^{-6}$<br>( $8.99 \times 10^{-6}$ ) | 0.000*<br>(0.000)     |
| Constant                   | 45.311 ***<br>(0.879)                              | 47.600 ***<br>(1.087) |
| Observations               | 2369                                               | 2159                  |
| Date                       | 31                                                 | 28                    |
| r2 within                  | 0.104                                              | 0.103                 |
| r2 between                 | 0.043                                              | 0.111                 |
| r2 overall                 | 0.102                                              | 0.103                 |

Note: Standard errors are in parentheses, \*\*\*  $p < 0.01$ , \*\*  $p < 0.05$ , \*  $p < 0.1$ .

**Table S15.** Variance in policy responses in March 2022 and April 2022.

| Independent variables      | Dependent variable: stringency                      |                       |
|----------------------------|-----------------------------------------------------|-----------------------|
|                            | March 2022                                          | April 2022            |
| new_deaths(−2) (I)         | −0.085 ***<br>(0.021)                               | −0.855 ***<br>(0.313) |
| vacci_fpc (−2) (II)        | −0.032<br>(0.022)                                   | 0.111 ***<br>(0.039)  |
| helt_cp (III)              | −0.053 **<br>(0.024)                                | −0.152 ***<br>(0.043) |
| Interaction (I × II)       | 0.002 ***<br>(0.000)                                | 0.013 ***<br>(0.004)  |
| Interaction (I × III)      | 0.000<br>(0.000)                                    | 0.012 ***<br>(0.004)  |
| Interaction (I × II × III) | $-8.03 \times 10^{-6}$<br>( $6.73 \times 10^{-6}$ ) | −0.000 ***<br>(0.000) |
| Constant                   | 43.918 ***<br>(1.287)                               | 34.242<br>(2.501)     |
| Observations               | 2102                                                | 649                   |
| Date                       | 31                                                  | 15                    |
| r2 within                  | 0.050                                               | 0.080                 |
| r2 between                 | 0.126                                               | 0.120                 |
| r2 overall                 | 0.051                                               | 0.077                 |

Note: Standard errors are in parentheses, \*\*\*  $p < 0.01$ , \*\*  $p < 0.05$ , \*  $p < 0.1$ .

### Robustness Check 1: Using Alternative Independent Variables

**Table S16.** Panel unit root test using IPS and Fisher Methods (Robust Model 1).

| Model             | Testing Method  | Stringency Index       | New Cases               | Vaccinated Percentage                                        | Hospital Bed                                                 |
|-------------------|-----------------|------------------------|-------------------------|--------------------------------------------------------------|--------------------------------------------------------------|
| Robust Model<br>1 | IPS             | $-1.6 \times 10^2$ *** | $-1.7e \times 10^2$ *** | Insufficient number of<br>time periods to compute<br>W-t-bar | Insufficient number of<br>time periods to compute<br>W-t-bar |
|                   | ADF-Fisher (P)  | $2.07 \times 10^4$ *** | $2.20e \times 10^4$ *** | 2987.816 ***                                                 | -                                                            |
|                   | ADF-Fisher (Z)  | −136.628 ***           | −141.853 ***            | −40.299 ***                                                  | -                                                            |
|                   | ADF-Fisher (L*) | −327.528 ***           | −346.895 ***            | −46.723 ***                                                  | -                                                            |
|                   | ADF-Fisher (Pm) | 576.418 ***            | 611.528 ***             | 68.246 ***                                                   | -                                                            |

Note: xtunitroot ips vacci\_pc, lags(1) demean, xtunitroot fisher vacci\_pc, dfuller drift lags(1) demean; Robust standard errors in parentheses. \*\*\*  $p < 0.01$ , \*\*  $p < 0.05$ , \*  $p < 0.1$

# Variation in Global Policy Responses to COVID-19: A Bidirectional Analysis

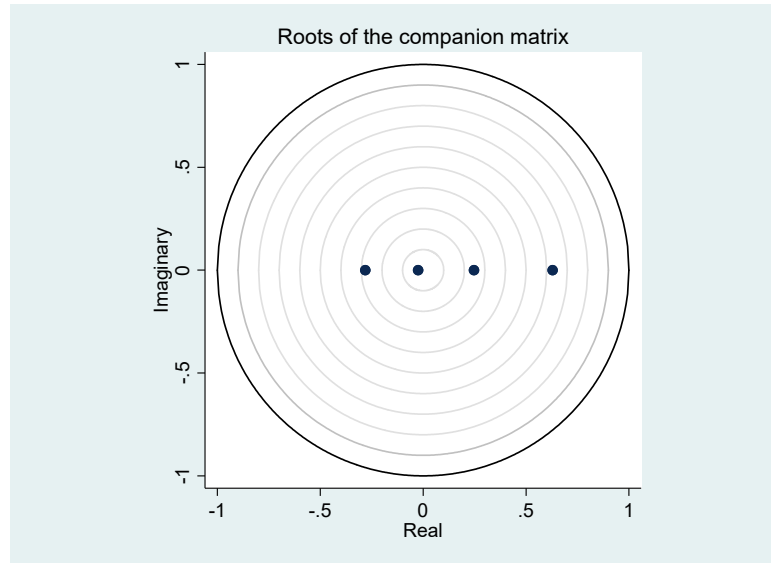

**Figure S6.** Roots of the Companion Matrix in Robust Model 1.

**Table S17.** Eigenvalue Stability Condition of Robust Model 1.

| Model          | Eigenvalue |           | Modulus |
|----------------|------------|-----------|---------|
|                | Real       | Imaginary |         |
| Robust Model 1 | 0.629      | 0         | 0.629   |
|                | -0.281     | 0         | 0.281   |
|                | 0.247      | 0         | 0.247   |
|                | -0.025     | 0         | 0.025   |

**Table S18.** PVAR results of Robust Model 1.

| Model          | Response to     | Response of                             |                            |                       |                                                     |
|----------------|-----------------|-----------------------------------------|----------------------------|-----------------------|-----------------------------------------------------|
|                |                 | stringency                              | new_cases                  | vacci_pc              | hosp                                                |
| Robust Model 1 | stringency (-1) | 0.320 ***<br>(0.036)                    | -3340.259 ***<br>(181.190) | -0.116 ***<br>(0.041) | 0.008<br>(0.005)                                    |
|                | new_cases (-1)  | -0.000 ***<br>( $9.13 \times 10^{-6}$ ) | -0.001<br>(0.050)          | -0.000 **<br>(0.000)  | $-1.25 \times 10^{-7}$<br>( $1.05 \times 10^{-6}$ ) |
|                | vacci_pc (-1)   | 0.202 ***<br>(0.028)                    | -2381.046 ***<br>(135.505) | 0.226 ***<br>(0.029)  | 0.009 ***<br>(0.003)                                |
|                | hosp (-1)       | 1.073 ***<br>(1.172)                    | -18008.89 ***<br>(901.278) | -0.382<br>(0.253)     | 0.025<br>(0.027)                                    |

Note: There are 4098 observations with 300 panels; Instrument: 1(1/2). (stringency new\_cases vacci\_pc hosp); Robust standard errors in parentheses; \*\*\*  $p < 0.01$ , \*\*  $p < 0.05$ , \*  $p < 0.1$ .

**Table S19.** Grange Causality Test of Robust Model 1.

| Equation       | Excluded variables | Chi2    | df   | Prob. |
|----------------|--------------------|---------|------|-------|
| Robust Model 1 | stringency         | n.a.    | n.a. | n.a.  |
|                | new_cases          | 21.051  | 1    | 0.000 |
|                | vacci_pc           | 53.057  | 1    | 0.000 |
|                | hosp               | 38.694  | 1    | 0.000 |
|                | All                | 63.781  | 3    | 0.000 |
|                | new_cases          | n.a.    | n.a. | n.a.  |
|                | stringency         | 339.855 | 1    | 0.000 |
|                | vacci_pc           | 308.762 | 1    | 0.000 |
|                | hosp               | 399.260 | 1    | 0.000 |
|                | All                | 453.956 | 3    | 0.000 |
|                | vacci_pc           | n.a.    | n.a. | n.a.  |
|                | stringency         | 7.861   | 1    | 0.005 |
|                | new_cases          | 6.009   | 1    | 0.014 |
|                | hosp               | 2.283   | 1    | 0.131 |

# Variation in Global Policy Responses to COVID-19: A Bidirectional Analysis

|      |            |        |      |       |
|------|------------|--------|------|-------|
|      | All        | 23.398 | 3    | 0.000 |
|      | hosp       | n.a.   | n.a. | n.a.  |
|      | stringency | 2.602  | 1    | 0.107 |
| hosp | new_cases  | 0.014  | 1    | 0.905 |
|      | vacci_pc   | 7.719  | 1    | 0.005 |
|      | All        | 8.771  | 3    | 0.032 |

## Robustness Check 2: Using the Dependent Variable's Components and Alternative Method

**Table S20.** Descriptive Statistics of Using Alternative Independent Variables.

| Variable   | Observation | Mean     | Standard Deviation | Min   | Max       |
|------------|-------------|----------|--------------------|-------|-----------|
| stringency | 52,226      | 47.063   | 17.973             | 0     | 97.22     |
| new_cases  | 53,206      | 6009.327 | 29,123.200         | 0     | 1,383,886 |
| vacci_pc   | 24,095      | 53.220   | 25.590             | 0.000 | 99.998    |
| hosp       | 29,890      | 3.159    | 2.431              | 0.260 | 13.110    |

**Table S21.** Correlation of Alternative Independent Variables.

|                       | Stringency Index       | New Cases             | Vaccinated Percentage | Hospital Bed      |
|-----------------------|------------------------|-----------------------|-----------------------|-------------------|
| Stringency Index      | 1.000<br>(52,226)      |                       |                       |                   |
| New Cases             | 0.099 ***<br>(51,756)  | 1.000<br>(53,206)     |                       |                   |
| Vaccinated Percentage | -0.071 ***<br>(23,761) | 0.172 ***<br>(24,069) | 1.000<br>(24,095)     |                   |
| Hospital Bed          | -0.108 ***<br>(29,101) | 0.135 ***<br>(29,872) | 0.161 ***<br>(18,298) | 1.000<br>(29,890) |

Note: star(0.01) obs pwcrr(correlation); Robust standard errors in parentheses; \*\*\*  $p < 0.01$ , \*\*  $p < 0.05$ , \*  $p < 0.1$ .

**Table S22.** Results of Multinomial Logistic Regression on School closures (C1).

| Independent variables | Dependent variable: School closures (C1) |                      |                      |
|-----------------------|------------------------------------------|----------------------|----------------------|
|                       | 1                                        | 2                    | 3                    |
| new_deaths            | 0.998 ***<br>(0.000)                     | 1.002 ***<br>(0.000) | 1.002 ***<br>(0.000) |
| vacci_fpc             | 1.008 ***<br>(0.001)                     | 1.004 ***<br>(0.001) | 0.977 ***<br>(0.001) |
| helt_cp               | 1.027 ***<br>(0.001)                     | 1.014 ***<br>(0.001) | 1.014 ***<br>(0.002) |
| Intercept             | 0.638 ***<br>(0.035)                     | 0.577 ***<br>(0.030) | 0.649 ***<br>(0.038) |

Total N = 23,462; Notes: Robust standard errors in parentheses; \*\*\*  $p < 0.01$ , \*\*  $p < 0.05$ , \*  $p < 0.1$ ; Reference category for the model is countries and territories without taking response policy to Covid-19.

**Table S23.** Results of Multinomial Logistic Regression on Workplace Closures (C2).

| Independent variables | Dependent variable: Workplace closures (C2) |                      |                      |
|-----------------------|---------------------------------------------|----------------------|----------------------|
|                       | 1                                           | 2                    | 3                    |
| new_deaths            | 1.005 ***<br>(0.001)                        | 1.007 ***<br>(0.001) | 1.007 ***<br>(0.001) |
| vacci_fpc             | 1.002<br>(0.001)                            | 0.999 ***<br>(0.001) | 1.004 **<br>(0.001)  |
| helt_cp               | 1.002 ***<br>(0.001)                        | 1.012 ***<br>(0.001) | 1.003 *<br>(0.002)   |
| Intercept             | 3.064 ***<br>(0.213)                        | 2.167 ***<br>(0.153) | 0.483 ***<br>(0.044) |

Total N = 23,470; Notes: Robust standard errors in parentheses; \*\*\*  $p < 0.01$ , \*\*  $p < 0.05$ , \*  $p < 0.1$ ; Reference category for the model is countries and territories without taking response policy to COVID-19.

# Variation in Global Policy Responses to COVID-19: A Bidirectional Analysis

**Table S24.** Results of Multinomial Logistic Regression on Cancellation of Public Events(C3).

| Independent variables. | Dependent variable: Cancellation of public events(C3) |                      |
|------------------------|-------------------------------------------------------|----------------------|
|                        | 1                                                     | 2                    |
| new_deaths             | 1.007 ***<br>(0.001)                                  | 1.008 ***<br>(0.001) |
| vacci_fpc              | 0.992 ***<br>(0.001)                                  | 0.995 ***<br>(0.001) |
| helt_cp                | 1.006 ***<br>(0.001)                                  | 0.998 *<br>(0.001)   |
| Intercept              | 3.538 ***<br>(0.274)                                  | 5.137 ***<br>(0.387) |

Total N = 23,469; Notes: Robust standard errors in parentheses; \*\*\*  $p < 0.01$ , \*\*  $p < 0.05$ , \*  $p < 0.1$ ; Reference category for the model is countries and territories without taking response policy to COVID-19.

**Table S25.** Results of Multinomial Logistic Regression on Restrictions on Public Gatherings Size(C4).

| Independent variables | Dependent variable: Restrictions on public gatherings size(C4) |                      |                      |                      |
|-----------------------|----------------------------------------------------------------|----------------------|----------------------|----------------------|
|                       | 1                                                              | 2                    | 3                    | 4                    |
| new_deaths            | 0.998 ***<br>(0.000)                                           | 1.001 ***<br>(0.000) | 1.000<br>(0.000)     | 1.001 ***<br>(0.000) |
| vacci_fpc             | 0.996 ***<br>(0.002)                                           | 0.983 ***<br>(0.001) | 0.972 ***<br>(0.001) | 0.984 ***<br>(0.001) |
| helt_cp               | 1.003 *<br>(0.002)                                             | 1.010 ***<br>(0.002) | 1.013 ***<br>(0.001) | 1.011 ***<br>(0.001) |
| Intercept             | 0.510 ***<br>(0.050)                                           | 1.380 ***<br>(0.101) | 4.486 ***<br>(0.291) | 3.419 ***<br>(0.219) |

Total N = 23,447; Notes: Robust standard errors in parentheses; \*\*\*  $p < 0.01$ , \*\*  $p < 0.05$ , \*  $p < 0.1$ ; Reference category for the model is countries and territories without taking response policy to COVID-19.

**Table S26.** Results of Multinomial Logistic Regression on Closures of Public Transport(C5).

| Independent variables | Dependent variable: Closures of public transport(C5) |                      |
|-----------------------|------------------------------------------------------|----------------------|
|                       | 1                                                    | 2                    |
| new_deaths            | 1.002 ***<br>(0.000)                                 | 1.002 ***<br>(0.000) |
| vacci_fpc             | 0.986 ***<br>(0.001)                                 | 0.988 ***<br>(0.001) |
| helt_cp               | 0.999<br>(0.001)                                     | 0.992 ***<br>(0.001) |
| Intercept             | 0.916 **<br>(0.037)                                  | 0.452 ***<br>(0.023) |

Total N = 23,468; Notes: Robust standard errors in parentheses; \*\*\*  $p < 0.01$ , \*\*  $p < 0.05$ , \*  $p < 0.1$ ; Reference category for the model is countries and territories without taking response policy to COVID-19.

**Table S27.** Results of Multinomial Logistic Regression on Stay-at-home Requirement(C6).

| Independent variables | Dependent variable: Stay-at-home requirement(C6) |                      |                      |
|-----------------------|--------------------------------------------------|----------------------|----------------------|
|                       | 1                                                | 2                    | 3                    |
| new_deaths            | 1.002 ***<br>(0.000)                             | 1.002 ***<br>(0.000) | 1.003 ***<br>(0.000) |
| vacci_fpc             | 0.997 ***<br>(0.001)                             | 0.971 ***<br>(0.001) | 0.957 ***<br>(0.003) |
| helt_cp               | 1.000<br>(0.001)                                 | 0.987 ***<br>(0.001) | 0.999<br>(0.004)     |
| Intercept             | 0.639 ***<br>(0.033)                             | 2.810 ***<br>(0.131) | 0.082 ***<br>(0.012) |

Total N = 23,447; Notes: Robust standard errors in parentheses; \*\*\*  $p < 0.01$ , \*\*  $p < 0.05$ , \*  $p < 0.1$ ; Reference category for the model is countries and territories without taking response policy to COVID-19.

## Variation in Global Policy Responses to COVID-19: A Bidirectional Analysis

**Table S28.** Results of Multinomial Logistic Regression on Restrictions on Internal Movements(C7).

| Independent variables | Dependent variable: Restrictions on internal movements(C7) |                      |
|-----------------------|------------------------------------------------------------|----------------------|
|                       | 1                                                          | 2                    |
| new_deaths            | 1.007 ***<br>(0.000)                                       | 1.006 ***<br>(0.000) |
| vacci_fpc             | 1.006 ***<br>(0.001)                                       | 0.991 ***<br>(0.001) |
| helt_cp               | 0.983 ***<br>(0.001)                                       | 0.990 ***<br>(0.001) |
| Intercept             | 0.270 ***<br>(0.015)                                       | 0.910 **<br>(0.036)  |

Total N = 23,467; Notes: Robust standard errors in parentheses; \*\*\*  $p < 0.01$ , \*\*  $p < 0.05$ , \*  $p < 0.1$ ; Reference category for the model is countries and territories without taking response policy to COVID-19.

**Table S29.** Results of Multinomial Logistic Regression on International Travel Controls(C8).

| Independent variables | Dependent variable: International travel controls(C8) |                          |                         |                        |
|-----------------------|-------------------------------------------------------|--------------------------|-------------------------|------------------------|
|                       | 1                                                     | 2                        | 3                       | 4                      |
| new_deaths            | 1.004 ***<br>(0.001)                                  | 1.004 ***<br>(0.001)     | 1.005 ***<br>(0.001)    | 1.006 ***<br>(0.001)   |
| vacci_fpc             | 0.957 ***<br>(0.002)                                  | 0.969 ***<br>(0.002)     | 0.970 ***<br>(0.002)    | 0.975 ***<br>(0.003)   |
| helt_cp               | 0.967 ***<br>(0.003)                                  | 0.969 ***<br>(0.003)     | 0.987 ***<br>(0.003)    | 0.980 ***<br>(0.003)   |
| Intercept             | 556.22 ***<br>(136.657)                               | 447.136 ***<br>(109.745) | 169.958 ***<br>(41.760) | 51.980 ***<br>(13.229) |

Total N = 23,469; Notes: Robust standard errors in parentheses; \*\*\*  $p < 0.01$ , \*\*  $p < 0.05$ , \*  $p < 0.1$ ; Reference category for the model is countries and territories without taking response policy to COVID-19.

**Table S30.** Results of Multinomial Logistic Regression on Public Information Campaigns(H1).

| Independent variables | Dependent variable: Public information campaigns (H1) |                        |
|-----------------------|-------------------------------------------------------|------------------------|
|                       | 1                                                     | 2                      |
| new_deaths            | 1.043<br>(0.051)                                      | 1.047<br>(0.051)       |
| vacci_fpc             | 0.982 ***<br>(0.006)                                  | 1.001<br>(0.006)       |
| helt_cp               | 1.017 ***<br>(0.006)                                  | 1.036 ***<br>(0.005)   |
| Intercept             | 6.365 ***<br>(1.904)                                  | 49.451 ***<br>(14.293) |

Total N = 22,446; Notes: Robust standard errors in parentheses; \*\*\*  $p < 0.01$ , \*\*  $p < 0.05$ , \*  $p < 0.1$ ; Reference category for the model is countries and territories without taking response policy to COVID-19.

### Robustness Check 3: Comparing other regions and employing alternative method

**Table S31.** Variance in policy responses across regions (North America and South America).

| Independent variables      | Dependent variable: stringency |                       |
|----------------------------|--------------------------------|-----------------------|
|                            | North America                  | South America         |
| new_deaths(-2) (I)         | -0.010<br>(0.023)              | 0.036 ***<br>(0.010)  |
| vacci_fpc (-2) (II)        | -0.434 ***<br>(0.014)          | -0.301 ***<br>(0.014) |
| helt_cp (III)              | 0.153<br>(0.215)               | 0.324 **<br>(0.156)   |
| Interaction (I × II)       | 0.002 ***<br>(0.000)           | -0.001 *<br>(0.000)   |
| Interaction (I × III)      | 0.000<br>(0.000)               | -0.001 ***<br>(0.000) |
| Interaction (I × II × III) | -0.000 ***                     | 0.000 ***             |

# Variation in Global Policy Responses to COVID-19: A Bidirectional Analysis

|              |                                          |                                          |
|--------------|------------------------------------------|------------------------------------------|
| Constant     | (7.35 × 10 <sup>-6</sup> )<br>62.178 *** | (6.10 × 10 <sup>-6</sup> )<br>58.114 *** |
| Observations | (8.028)<br>2834                          | (5.341)<br>2677                          |
| Countries    | 19                                       | 12                                       |
| r2 within    | 0.290                                    | 0.213                                    |
| r2 between   | 0.003                                    | 0.334                                    |
| r2 overall   | 0.111                                    | 0.293                                    |

Note: Standard errors are in parentheses, \*\*\*  $p < 0.01$ , \*\*  $p < 0.05$ , \*  $p < 0.1$ ; The results are examined from using Model 5.

**Table S32.** PVAR results in Asia, Europe and Africa.

| Region | Coefficients    | Dependent Variables   |                        |                       |                       |
|--------|-----------------|-----------------------|------------------------|-----------------------|-----------------------|
|        |                 | stringency            | new_deaths             | vacci_fpc             | helt_cp               |
| Asia   | stringency (-1) | -1.245 ***<br>(0.413) | 3.498<br>(5.621)       | -0.636 ***<br>(0.187) | -1.354 ***<br>(0.321) |
|        | new_deaths (-1) | 0.015 ***<br>(0.004)  | 0.130*<br>(0.078)      | -0.005 **<br>(0.002)  | -0.009 ***<br>(0.003) |
|        | vacci_fpc (-1)  | -0.138<br>(0.477)     | -29.709 ***<br>(6.244) | -1.184 ***<br>(0.260) | -1.147 ***<br>(0.384) |
|        | helt_cp (-1)    | -1.994 ***<br>(0.618) | 4.597<br>(8.837)       | 0.932 ***<br>(0.340)  | -0.336<br>(0.543)     |
|        |                 |                       |                        |                       |                       |
| Europe | stringency (-1) | 1.393 ***<br>(0.181)  | -35.650 ***<br>(4.658) | 2.077 ***<br>(0.251)  | 0.674 ***<br>(0.172)  |
|        | new_deaths (-1) | -0.000<br>(0.004)     | -0.527 **<br>(0.237)   | 0.027 **<br>(0.013)   | -0.016 ***<br>(0.003) |
|        | vacci_fpc (-1)  | 0.017<br>(0.089)      | -27.266 ***<br>(2.240) | 1.047 ***<br>(0.131)  | -0.305 ***<br>(0.071) |
|        | helt_cp (-1)    | 0.372<br>(0.345)      | -0.878<br>(6.638)      | -0.692 *<br>(0.355)   | 0.512 **<br>(0.246)   |
|        |                 |                       |                        |                       |                       |
| Africa | stringency (-1) | -1.509 ***<br>(0.335) | -0.777 ***<br>(0.282)  | -0.667 ***<br>(0.219) | -0.775 ***<br>(0.189) |
|        | new_deaths (-1) | 0.045 **<br>(0.018)   | -0.015<br>(0.017)      | 0.054 ***<br>(0.012)  | 0.038 ***<br>(0.010)  |
|        | vacci_fpc (-1)  | 0.460 **<br>(0.229)   | 0.585 ***<br>(0.179)   | 0.471 **<br>(0.197)   | 0.596 ***<br>(0.138)  |
|        | helt_cp (-1)    | -1.269 ***<br>(0.299) | -0.614 ***<br>(0.203)  | -1.361 ***<br>(0.189) | -0.447 ***<br>(0.154) |
|        |                 |                       |                        |                       |                       |

Notes: In the sub-samples, there are 498 observations with 233 panels (Asia), 519 observations with 242 panels (Europe), 167 observations with 110 panels (Africa). These results can not be formally referenced due to that the stability of condition fails to be satisfied with applying the pvar method, its function in this section mainly serves to prove the heterogeneity of government interventions across these regions. Instrument: 1(1/1). (stringency new\_deaths vacci\_fpc health\_capacity). Standard errors are in parentheses, \*\*\*  $p < 0.01$ , \*\*  $p < 0.05$ , \*  $p < 0.1$ .
